# Supplementary material for: Restoring Sperm Quality Post-Cryopreservation Using Mitochondrial-Targeted Compounds
Source: MDPI journal article supplement (doi:10.3390/antiox11091808), 2022-09-14
Supplement: s1 [file s1]

**Supplementary Table S1.** Subgroup analyses for age effects on DNA damage.

| Age                      | ≤35        | >35        | P-value* |
|--------------------------|------------|------------|----------|
| <b>n (%)</b>             | 13 (38.2)  | 21 (61.8)  |          |
| <b>HALO</b> , mean ± SD  | 12.1 ± 7.6 | 15.8 ± 9.4 | 0.2      |
| <b>8OHdG</b> , mean ± SD | 12.2 ± 5.9 | 10.1 ± 5.1 | 0.3      |

\* Unpaired, Two-tailed Student's T-test

**Supplementary Table S2.** Subgroup analyses for male factor infertility effect on DNA damage and percentage of high mitochondrial membrane potential.

| <b>Cause of Infertility</b>  | <b>Non-Male Factor</b> | <b>Male Factor</b> | <b>P-value*</b> |
|------------------------------|------------------------|--------------------|-----------------|
| <b>n (%)</b>                 | 22 (64.7)              | 12 (35.3)          |                 |
| <b>HALO, mean ± SD</b>       | 13.5 ± 7.5             | 16.1 ± 11.0        | 0.4             |
| <b>8OHdG, mean ± SD</b>      | 10.8 ± 5.9             | 11.2 ± 4.6         | 0.8             |
| <b>High MMP %, mean ± SD</b> | 0.3 ± 0.2              | 1.4 ± 0.9          | 0.07            |

\* Unpaired, Two-tailed Student's T-test
